# Supplementary material
Source: PubMed Central journal article supplement (PMC2657396)
Supplement: 0810067106_0810067106SI.pdf [file 0810067106_0810067106SI.pdf]

# Supporting Information

Xia et al. 10.1073/pnas.0810067106

## SI Materials and Methods

**Identification of ChIP-chip Peaks.** The model-based analysis of tiling-array (*MAT*) algorithm (11) was used to identify regions enriched by ChIP-chip ("hits") on Affymetrix whole-genome or promoter tiling arrays. *MAT* was used to identify probe intensity peaks comparing triplicate hypoxic ChIP vs. hypoxic input ("Hypoxic") and normoxic ChIP vs. normoxic input ("Normoxic"). *MAT* was run with the same parameters for each: bandwidth = 200, maximum gap = 400, minimum probes = 10, and *P* value cutoff =  $1 \times 10^{-5}$ . Hits appearing solely in the hypoxic samples were retained as hypoxia-unique. In cases where hypoxic and normoxic hits overlapped, hits for which the *MAT* score of hypoxic subtracted by that of normoxic samples were above the cutoff were also retained. The *MAT* library and mapping files were based on the March 2006 Human Genome Assembly (HG18). Hits flagged by *MAT* as mapping to repeat regions were excluded from consideration.

**Linking ChIP Hits to RefSeq Genes.** ChIP hits were associated with RefSeq genes from the University of California Santa Cruz (UCSC) RefGene table for HG18 based on chromosomal position. Specifically, hits falling within a window of 10 kb upstream and 2.5 kb downstream of a given RefSeq TSS were annotated as being in the "promoter" region of that gene. This definition of promoter is used as shorthand for "promoter and proximal enhancer region." Hits falling between 2.5 kb downstream of the TSS and the end of the transcribed region were annotated as being intragenic to the associated gene. Hits within 3 kb downstream of the transcriptional end position were termed "3-prime" to the gene. Hits within 50 kb of a gene but excluded from the above 3 categories were labeled "within 50 kb" and tentatively assigned to that gene. Any hit falling >50 kb of any gene was tagged as "long range" and not associated with any gene.

**De Novo Motif Analysis.** For de novo motif scanning, we used *Weeder* (12) at the [www.pesolelab.it/modtools/](http://www.pesolelab.it/modtools/) web site, and *MEME* (13) on the <http://meme.sdsc.edu/meme4/cgi-bin/meme.cgi> web site.

**shRNA Knockdown.** shRNA plasmids (pLKO.1) for HIF-1 $\alpha$  and 2 $\alpha$ , ARNT, JARID1B, and GFP (as a control) were obtained

from the RNAi Consortium. Lentivirus was packaged according to RNAi Consortium protocols.

**qPCR Validation of ChIP Hits (ChIP-qPCR).** qPCR primers were designed against regions of interest and also 2 negative control regions (5 and 10 kb upstream of the VEGF gene). All primer sequences are specified in Table S1. Fold enrichment was assessed by performing qPCR for the target region on samples taken before (Input) and after ChIP (ChIP) and calculated from the critical threshold cycles (Ct) as: fold enrichment = target region ratio[2 $\Delta$ Ct (Ct ChIP - Ct Input)]/control region ratio[2 $\Delta$ Ct (Ct ChIP - Ct Input)]. HIF-1-specific binding was defined as a >2-fold enrichment comparing HIF-1 ChIP with matched input samples and a >2-fold greater binding in hypoxic samples relative to either normoxic cells or hypoxic HIF-1 $\alpha$  knockdown (sh-HIF1 $\alpha$ ) cells.

**mRNA Expression Profiling.** HepG2, U87, and MDA-MB231 breast cancer cells were collected under normoxic conditions (0 h) and after 4, 8, and 12 h of hypoxia treatment (0.5% O<sub>2</sub>). For each cell line, 3 replicates of total RNA at each time point were prepared by using TRIzol, labeled, and hybridized to Affymetrix HG-U133Plus2 oligonucleotide arrays. We used GCRMA module on the GenePattern web site (<http://genepattern.broad.mit.edu>) to normalize the microarrays and identify probe sets that changed significantly comparing hypoxic samples with normoxic samples. For analysis of human tumor material, a dataset for Grade IV glioblastoma multiforme (14) was downloaded from the NCBI.

**Immunofluorescence Microscopy.** HepG2 or HepG2-shARNT cells were transiently transfected with a JARID1B expression plasmid pCS2 + 3HA-JARID1B, a gift from Yang Shi, Harvard Medical School. After 24 h, cells were plated on coverslips in 6-well plates. Cells were then incubated for another 24 h under either normoxic or hypoxic (0.5% O<sub>2</sub>) conditions. Cells were then fixed with 4% paraformaldehyde, permeabilized, and blocked with 3% milk-PBS. The coverslips were incubated with primary antibodies at RT for 1 h with anti-HA mAb (12CA5) and H3K4me3 pAb (ab8580, 1:4000; Abcam). After washes, the coverslips were incubated with Alexa Fluor 594-conjugated goat-anti-mouse and Alexa Fluor 488-conjugated goat-anti-rabbit secondary antibodies (1:500; Molecular Probes) for another half hour. The coverslips were then washed and mounted with Vectashield (Vector Laboratories) containing DAPI.

1. Wenger RH, Stiehl DP, Camenisch G (2005) Integration of oxygen signaling at the consensus HRE. *Sci STKE* 2005:re12.
2. Hirota K, Semenza GL (2006) Regulation of angiogenesis by hypoxia-inducible factor 1. *Crit Rev Oncol Hematol* 59:15–26.
3. Kim JW, Gao P, Liu YC, Semenza GL, Dang CV (2007) Hypoxia-inducible factor 1 and dysregulated c-Myc cooperatively induce vascular endothelial growth factor and metabolic switches hexokinase 2 and pyruvate dehydrogenase kinase 1. *Mol Cell Biol* 27:7381–7393.
4. Wellmann S, et al. (2008) Hypoxia upregulates the histone demethylase JMJD1A via HIF-1. *Biochem Biophys Res Commun* 372:892–897.
5. Beyer S, Kristensen MM, Jensen KS, Johansen JV, Staller P (2008) The histone demethylases JMJD1A and JMJD2B are transcriptional targets of hypoxia-inducible factor HIF. *J Biol Chem* 283:36542–36552.
6. Pollard PJ, Loenarz C, Mole DR, McDonough MA, Gleadow JM, Schofield CJ, Ratcliffe PJ (2008) Regulation of Jumonji-domain-containing histone demethylases by hypoxia-inducible factor (HIF)-1 $\alpha$ . *Biochem J* 416:387–394.
7. Baugh JA, et al. (2006) Dual regulation of macrophage migration inhibitory factor (MIF) expression in hypoxia by CREB and HIF-1. *Biochem Biophys Res Commun* 347:895–903.
8. Abboud ER, et al. (2007) Integrin-linked kinase: a hypoxia-induced anti-apoptotic factor exploited by cancer cells. *Int J Oncol* 30:113–122.
9. Erler JT, et al. (2006) Lysyl oxidase is essential for hypoxia-induced metastasis. *Nature* 440:1222–1226.
10. Bae SK, et al. (2006) Hypoxic induction of human visfatin gene is directly mediated by hypoxia-inducible factor-1. *FEBS Lett* 580:4105–4113.
11. Johnson WE, et al. (2006) Model-based analysis of tiling-arrays for ChIP-chip. *Proc Natl Acad Sci USA* 103:12457–12462.
12. Pavesi G, et al. (2006) MoD Tools: Regulatory motif discovery in nucleotide sequences from co-regulated or homologous genes. *Nucleic Acids Res* 34:W566–W570.
13. Bailey TL, Elkan C (1994) Fitting a mixture model by expectation maximization to discover motifs in biopolymers. *Proc Int Conf Intell Syst Mol Biol* 2:28–36.
14. Sun L, et al. (2006) Neuronal and glioma-derived stem cell factor induces angiogenesis within the brain. *Cancer Cell* 9:287–300.

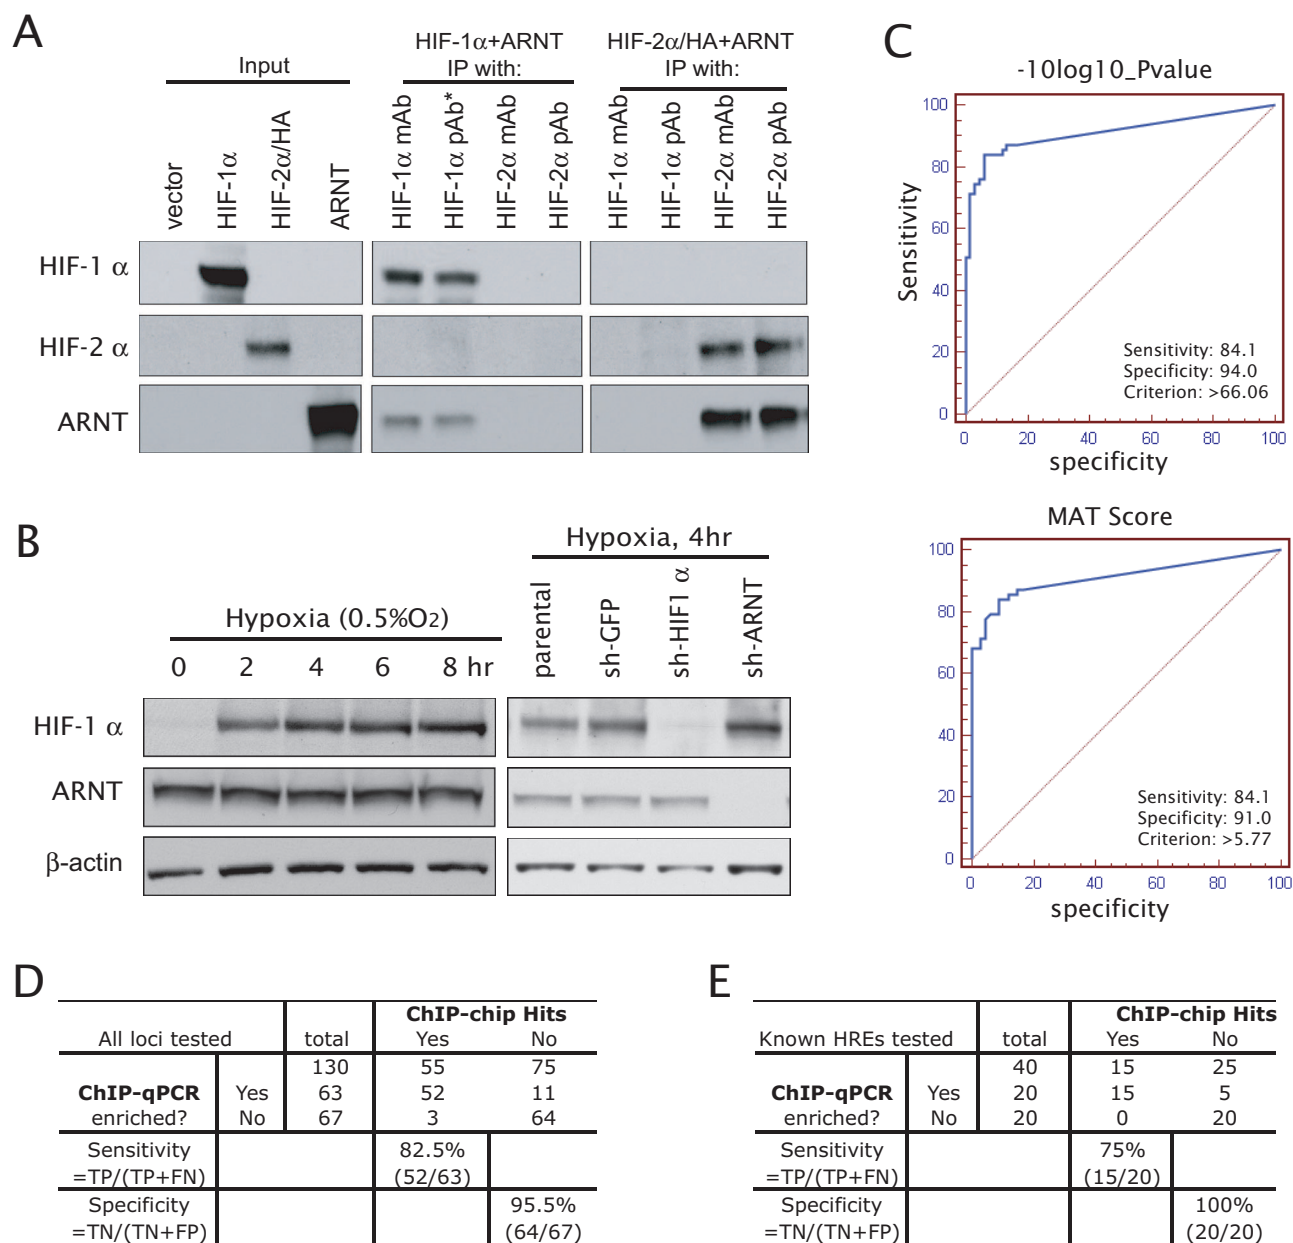

**Fig. S1.** HIF-1 ChIP. (A) HIF-1 $\alpha$ , HIF-2 $\alpha$ , and ARNT (HIF-1 $\beta$ ) were produced by in vitro-coupled transcription/translation. HIF-1 and HIF-2 heterodimers were immunoprecipitated and detected with the indicated antibodies. (B) HepG2 cells were exposed to hypoxia (0.5% O<sub>2</sub>) for the specified periods of time, and the abundance of HIF-1 $\alpha$ , ARNT/HIF-1 $\beta$ , and  $\beta$ -actin were determined by Western blot analysis. To knock down HIF-1 $\alpha$  or ARNT, HepG2 cells were infected with the lentivirus-expressing shRNAs targeting HIF-1 $\alpha$  (sh-HIF1 $\alpha$ ) or ARNT (sh-ARNT), in comparison with an shRNA targeting EGFP (sh-GFP) as a control. (C) The ChIP-qPCR results from Table S1 were used as benchmarks to generate receiver operating characteristic (ROC) curves for ChIP-chip vs. ChIP-qPCR results. Based on the results, we choose the cutoff as MAT score  $>5.77$  and  $-\log_{10} P$  value  $>66.05$ , which equals a  $P$  value  $<2.5 \times 10^{-7}$ . (D) Sensitivity and specificity of our analysis pipeline based on analysis of 130 loci. (E) Sensitivity and specificity of our analysis pipeline based on analysis of a subset of 40 well-characterized HIF-1 target loci.



A.

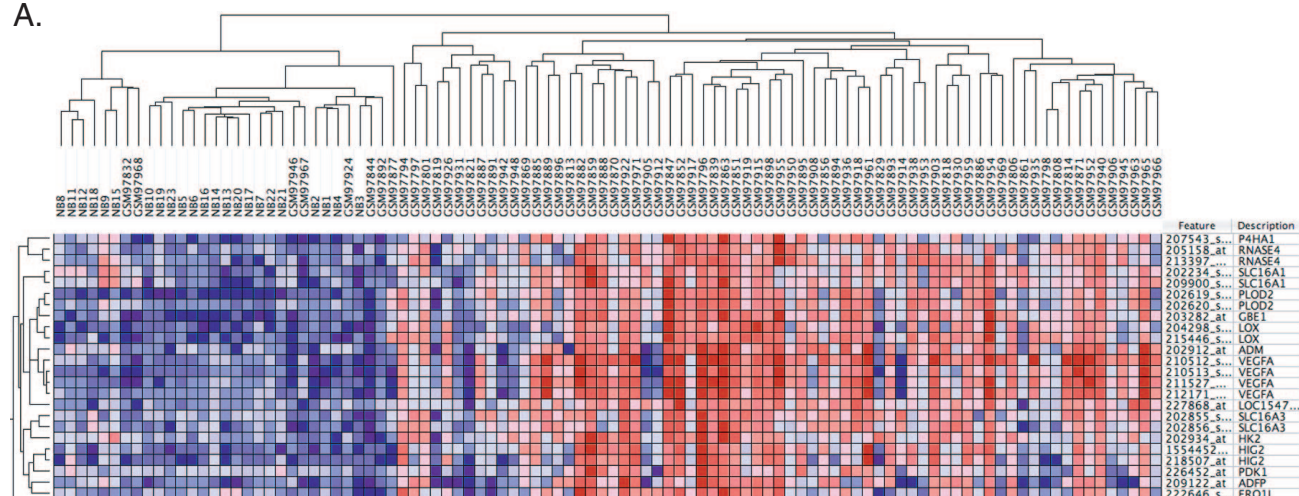

B.

### HIF-1 targets

|       |         |
|-------|---------|
| P4HA1 | SLC16A3 |
| PLOD2 | HK2     |
| GBE1  | HIG2    |
| LOX   | PDK1    |
| ADM   | ADFP    |
| VEGFA | ERO1L   |

**Fig. S3.** Glioblastoma samples are hypoxic. (A) Unsupervised hierarchical clustering was used to analyze gene expression profiles from glioblastoma multiforme samples (GSM-xxxxx) and normal brain (NB-xx) from GEO dataset GSE42900. Nearly all tumor samples clustered separately from the normal brain. (B) One large gene cluster that drove this distinction was a collection of genes consisting of known HIF-1 target genes or previously unknown HIF-1 targets identified in the present study.

## Other Supporting Information Files

[Table S1 \(XLS\)](#)

[Table S2 \(XLS\)](#)

[Table S3 \(XLS\)](#)

[Table S4 \(XLS\)](#)
